# Supplementary material
Source: PubMed Central journal article supplement (PMC4285918)
Supplement: hep0060-1920-SD1.pdf [file hep0060-1920-SD1.pdf]

**Online figure 1: Diagnostic accuracy of age and body-mass-index adjusted 2D-MRE for advanced fibrosis**

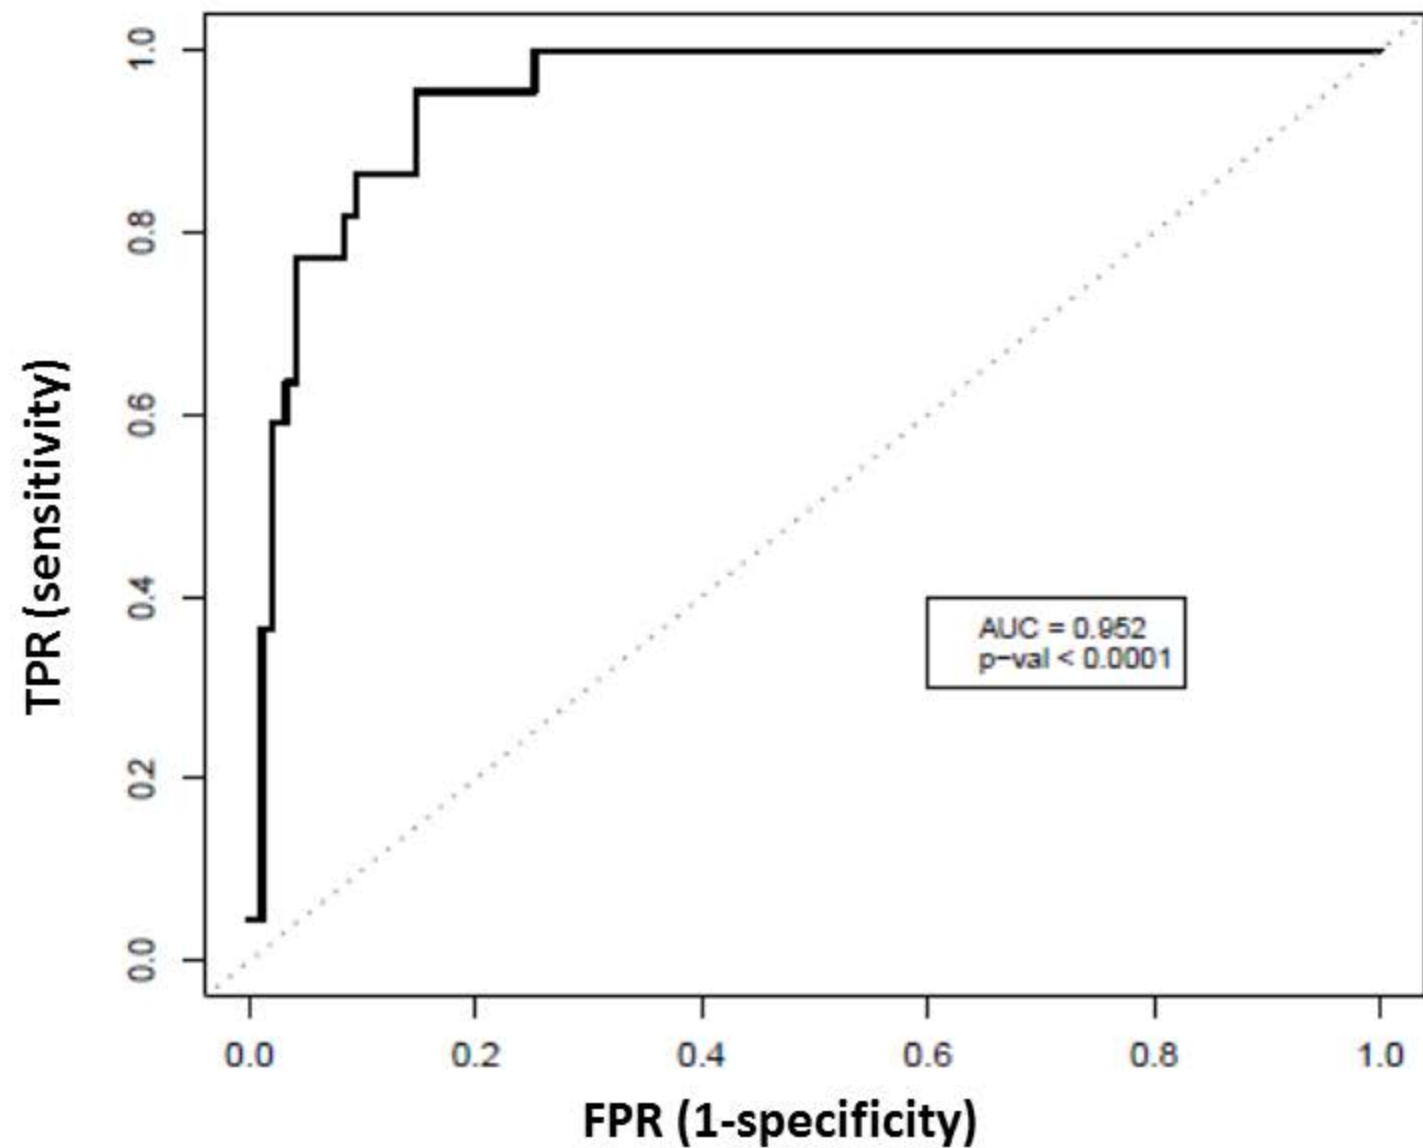

**Online Table 1: Baseline characteristics stratified by availability of the magnetic resonance elastography reading versus no availability of magnetic resonance elastography reading paired with a biopsy.**

|                                    | Patients who underwent MRE<br>n=117 | Patients who did not undergo MRE<br>n=47 | P values |
|------------------------------------|-------------------------------------|------------------------------------------|----------|
| <b>Demographics</b>                |                                     |                                          |          |
| Male patients %                    | 51 (43.6%)                          | 19 (40.4%)                               | 0.711    |
| Age (years)                        | 50.1 (13.4)                         | 51.6 (13.3)                              | 0.507    |
| Weight (kg) mean (SD)              | 91.8 (18.4)                         | 89.0 (22.4)                              | 0.407    |
| Height (cm) mean (SD)              | 1.68 (0.11)                         | 1.67 (0.10)                              | 0.566    |
| BMI (kg/m <sup>2</sup> ) mean (SD) | 32.4 (5.0)                          | 31.7 (6.2)                               | 0.445    |
| Ethnic origin:                     |                                     |                                          |          |
| White %                            | 61 (52.1%)                          | 23 (49.0%)                               | 0.711    |
| Black %                            | 1 (0.9%)                            | 0 (0.0%)                                 |          |
| Asian %                            | 20 (17.1%)                          | 12 (25.5%)                               |          |
| Hispanic %                         | 32 (27.4%)                          | 12 (25.5%)                               |          |
| Multi-racial %                     | 1 (0.9%)                            | 0 (0.0%)                                 |          |
| Other %                            | 1 (0.9%)                            | 0 (0.0%)                                 |          |
| Refused %                          | 1 (0.9%)                            | 0 (0.0%)                                 |          |
| Diabetes                           | 40 (34.19%)                         | 14 (29.8%)                               | 0.588    |
| <b>Biochemical Profile</b>         |                                     |                                          |          |
| ALT U/L mean (SD)                  | 66.3 (54.4)                         | 57.1 (47.9)                              | 0.309    |
| AST U/L mean (SD)                  | 45.4 (31.3)                         | 40.0 (27.4)                              | 0.308    |
| AST/ALT ration mean (SD)           | 0.77 (0.30)                         | 0.81 (0.28)                              | 0.410    |
| Alk Phos U/L mean (SD)             | 74.7 (23.4)                         | 82.4 (27.8)                              | 0.075    |
| GGT U/L mean (SD)                  | 59.3 (47.6)                         | 59.0 (47.6)                              | 0.973    |
| Total Bilirubin mg/dL mean (SD)    | 0.5 (0.4)                           | 0.5 (0.2)                                | 0.272    |
| Direct Bilirubin mg/dL mean (SD)   | 0.1 (0.08)                          | 0.1 (0.04)                               | 0.527    |
| Albumin g/dL mean (SD)             | 4.5 (0.3)                           | 4.5 (0.3)                                | 0.717    |
| Glucose mg/dL mean (SD)            | 107.1 (30.3)                        | 112.9 (39.2)                             | 0.311    |
| Hgb A1C mean (SD)                  | 6.1 (0.9)                           | 6.2 (0.9)                                | 0.741    |
| Triglycerides mg/dL mean (SD)      | 166.9 (98.7)                        | 155.7 (76.6)                             | 0.485    |
| Total Cholesterol mg/dL mean (SD)  | 186.0 (39.4)                        | 188.9 (42.2)                             | 0.678    |
| LDL mg/dL mean (SD)                | 106.2 (34.2)                        | 111.1 (36.8)                             | 0.425    |
| HDL mg/dL mean (SD)                | 48.4 (16.6)                         | 48.5 (12.8)                              | 0.428    |
| Prottime mean (SD)                 | 10.8 (1.0)                          | 10.8 (0.9)                               | 0.907    |
| <b>Histology</b>                   |                                     |                                          |          |
| Steatosis                          |                                     |                                          | 0.161    |
| 1                                  | 41 (35.0%)                          | 22 (46.8%)                               |          |

|                      |             |             |               |
|----------------------|-------------|-------------|---------------|
| 2                    | 43 (36.8%)  | 17 (36.2%)  |               |
| 3                    | 33 (28.2%)  | 8 (17.0%)   |               |
| Lobular Inflammation |             |             | <b>0.367</b>  |
| 0                    | 2 (1.7%)    | 0 (0.0%)    |               |
| 1                    | 46 (39.3%)  | 29 (61.7%)  |               |
| 2                    | 64 (54.7%)  | 15 (31.9%)  |               |
| 3                    | 5 (4.3%)    | 3 (6.4%)    |               |
| Ballooning           |             |             | <b>0.0001</b> |
| 0                    | 16 (13.7%)  | 20 (42.5%)  |               |
| 1                    | 77 (65.8%)  | 21 (44.7%)  |               |
| 2                    | 24 (20.5%)  | 6 (12.8%)   |               |
| Fibrosis             |             |             | <b>0.09</b>   |
| 0                    | 43 (36.8%)  | 24 (51.1%)  |               |
| 1                    | 39 (33.3%)  | 8 (17.0%)   |               |
| 2                    | 13 (11.1%)  | 4 (8.5%)    |               |
| 3                    | 12 (10.3%)  | 7 (14.9%)   |               |
| 4                    | 10 (8.5%)   | 4 (8.5%)    |               |
| NASH                 |             |             | <b>0.0001</b> |
| NAFLD                | 11 (9.4%)   | 21 (44.7%)  |               |
| Borderline NASH      | 15 (12.8%)  | 9 (19.1%)   |               |
| Definite NASH        | 91 (77.8%)  | 17 (36.2%)  |               |
| NAS mean (SD)        | 4.62 (1.36) | 3.85 (1.43) | <b>0.001</b>  |
